# Supplementary material for: Development of Alkylthiazole-Based Novel Thermoelectric Conjugated Polymers for Facile Organic Doping
Source: MDPI journal article supplement (doi:10.3390/nano13071286), 2023-04-06
Supplement: s1 [file s1]

# Development of Alkylthiazole-Based Novel Thermoelectric Conjugated Polymers for Facile Organic Doping

Junho Kim <sup>1</sup>, Eui Hyun Suh <sup>1</sup>, Kyumin Lee <sup>1</sup>, Gyuri Kim <sup>2</sup>, Hansu Kim <sup>1</sup>, Jaeyoung Jang <sup>1,\*</sup>  
and In Hwan Jung <sup>2,\*</sup>

<sup>1</sup> Department of Energy Engineering, Hanyang University,  
Seoul 04763, Republic of Korea

<sup>2</sup> Department of Organic and Nano Engineering, and Human-Tech Convergence  
Program, Hanyang University, 222 Wangsimni-ro, Seongdong-gu,  
Seoul 04763, Republic of Korea

\* Correspondence: jyjang15@hanyang.ac.kr (J.J.); inhjung@hanyang.ac.kr (I.H.J.)

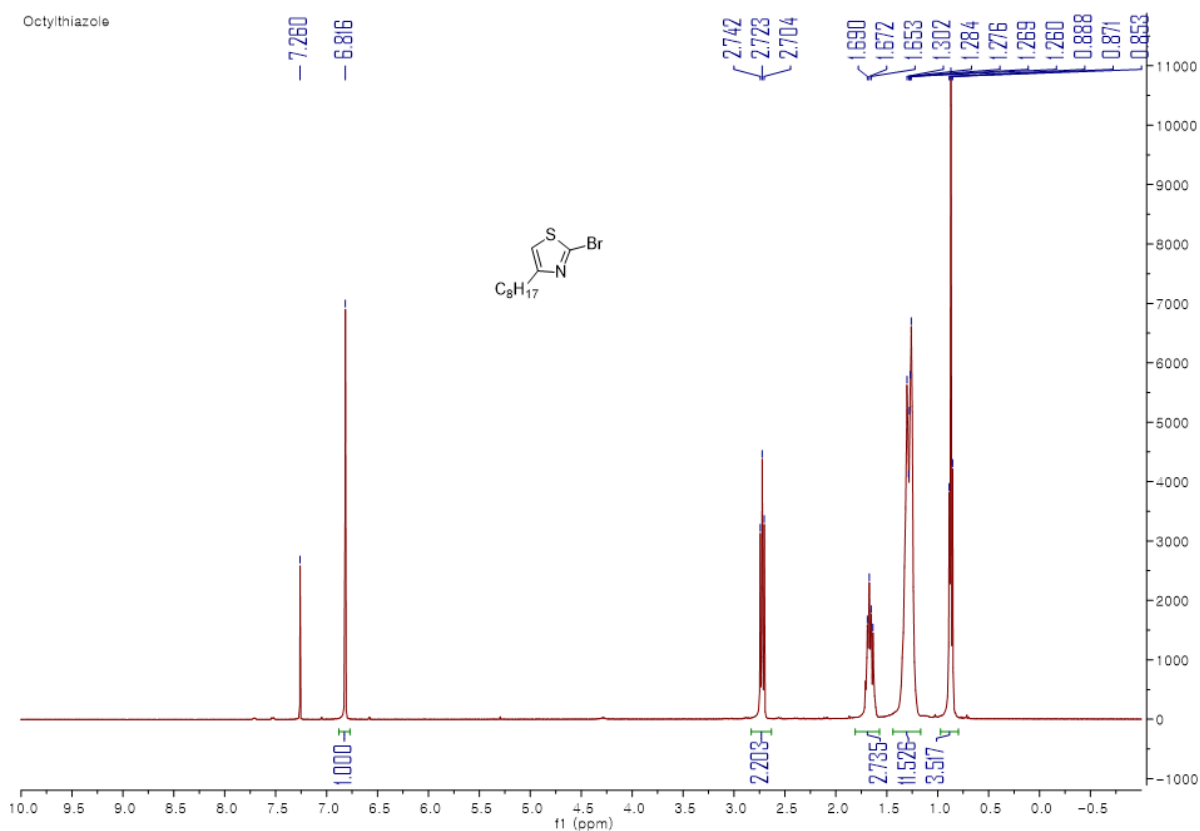

**Figure S1.** <sup>1</sup>H NMR spectrum of compound 1

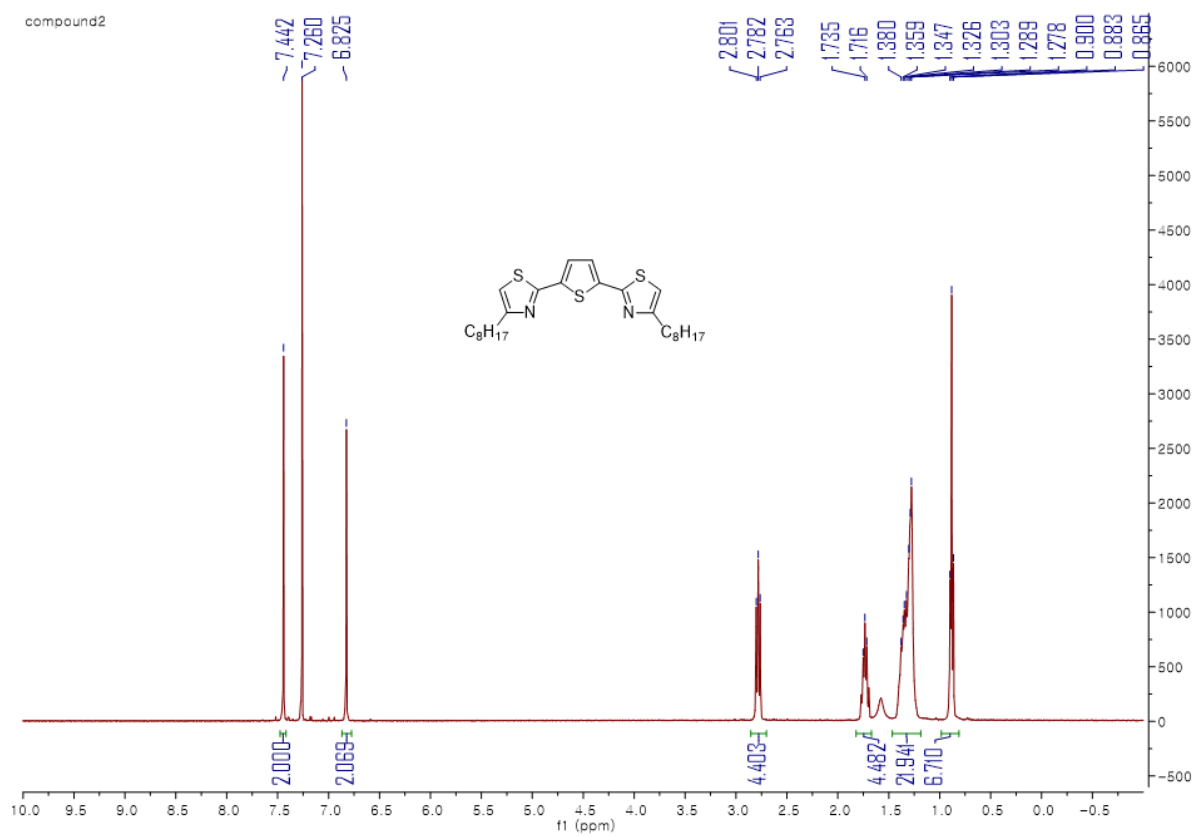

**Figure S2.**  $^1\text{H}$  NMR spectrum of compound 2

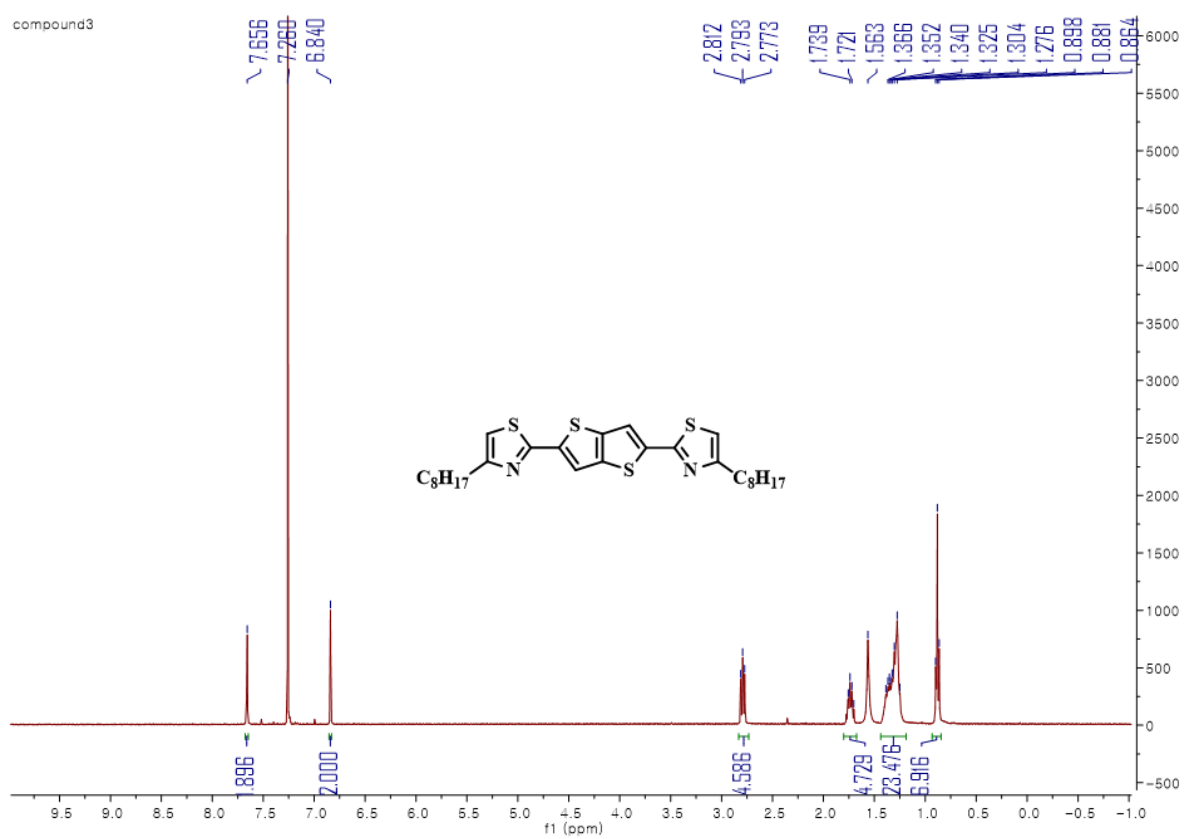

**Figure S3.**  $^1\text{H}$  NMR of compound 3

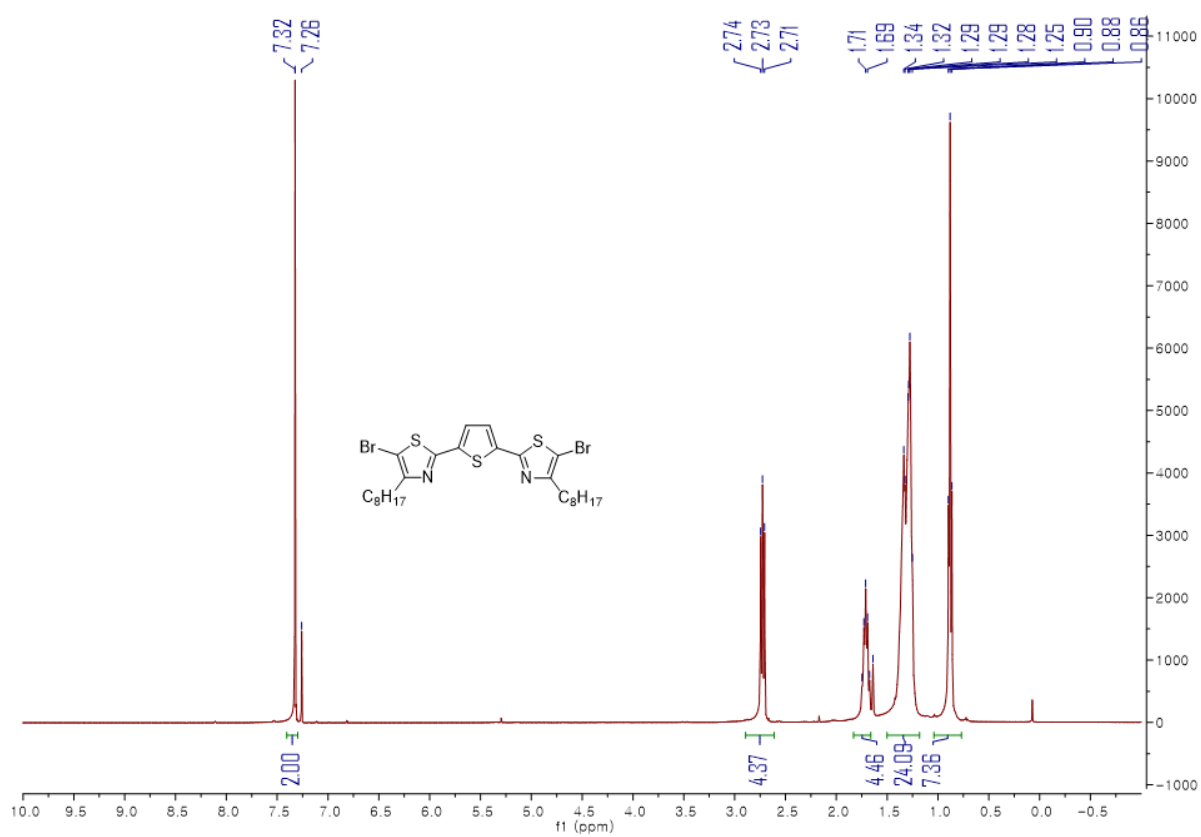

**Figure S4.**  $^1\text{H}$  NMR spectrum of Tz

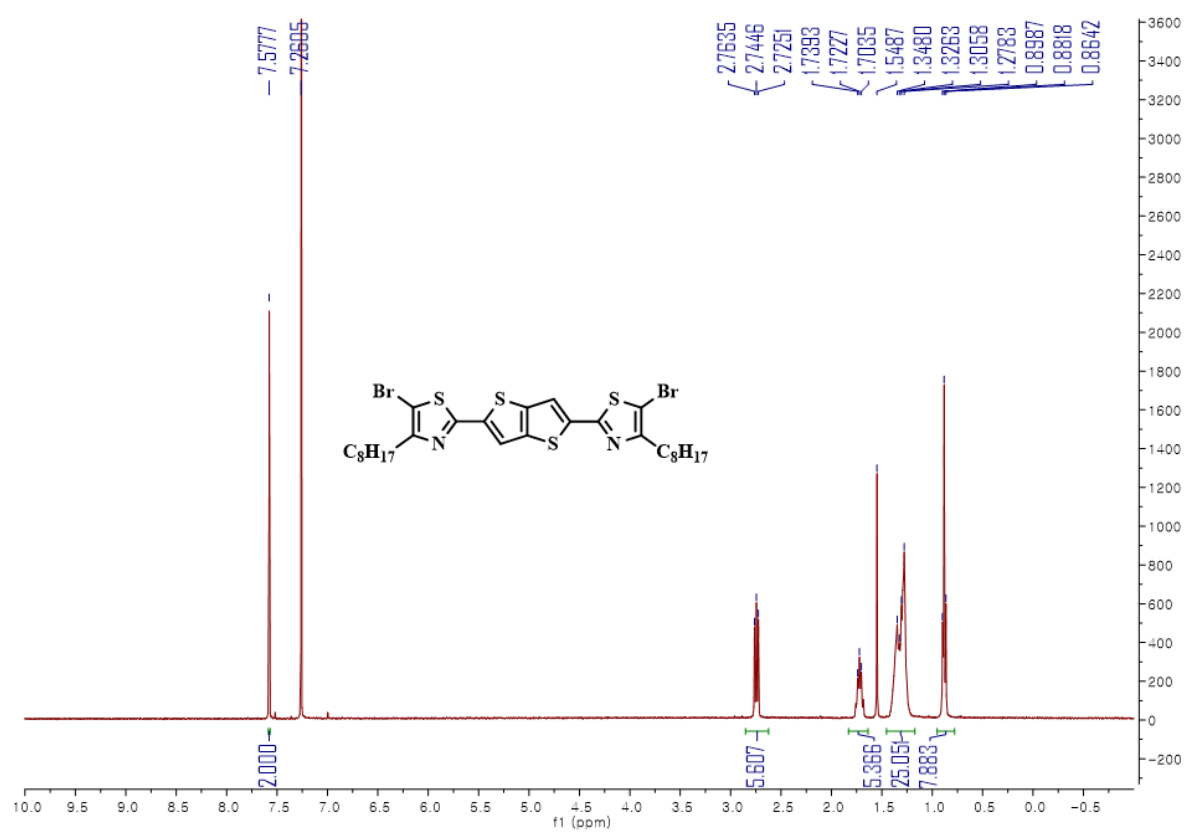

**Figure S5.** <sup>1</sup>H NMR spectrum of TTz

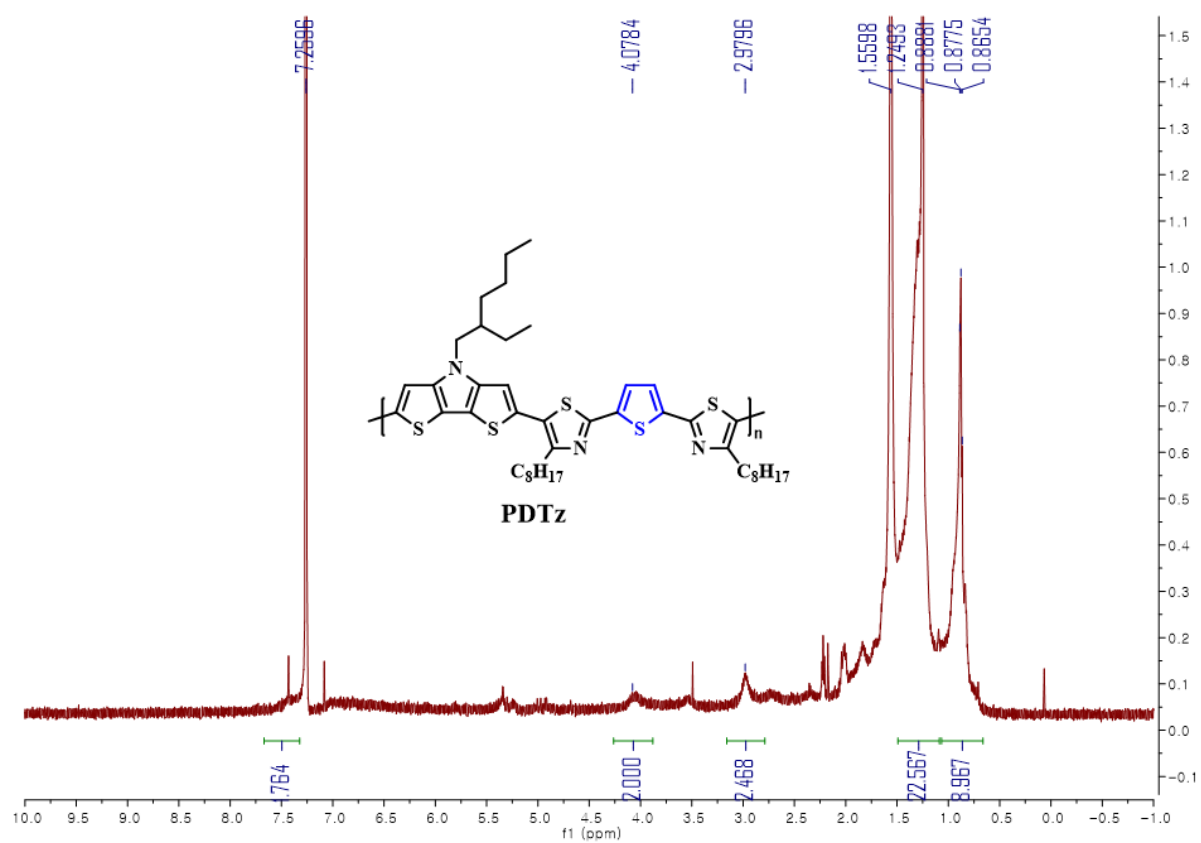

**Figure S6.**  $^1\text{H}$  NMR spectrum of PDTz

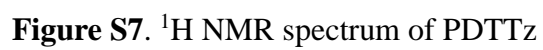

**Figure S7.**  $^1\text{H}$  NMR spectrum of PDTTz

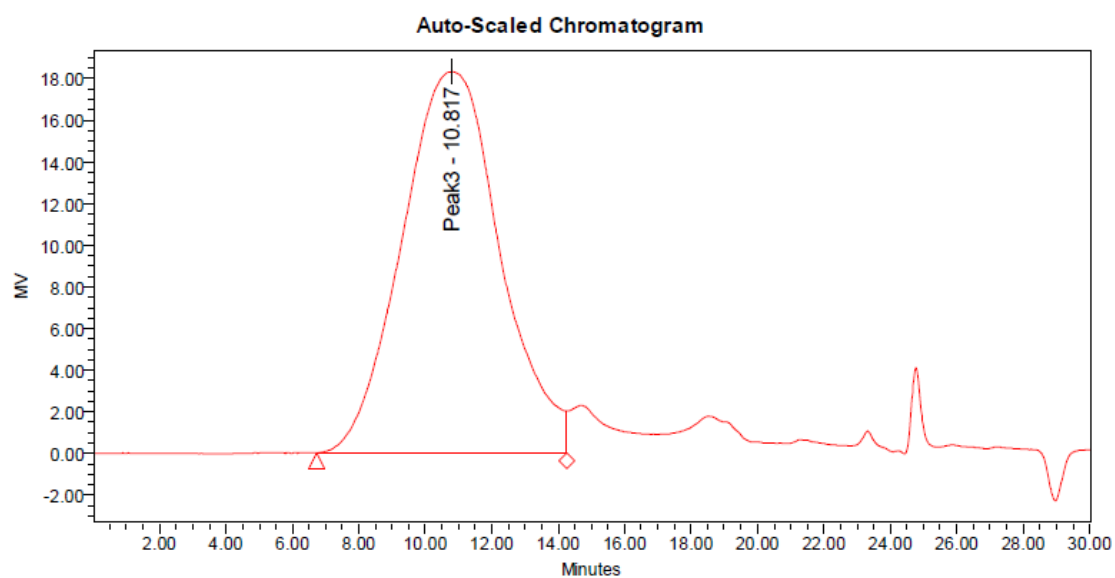

| GPC Results |           |        |        |    |        |        |    |                |             |             |
|-------------|-----------|--------|--------|----|--------|--------|----|----------------|-------------|-------------|
|             | Dist Name | Mn     | Mw     | MP | Mz     | Mz+1   | Mv | Polydispersity | MW Marker 1 | MW Marker 2 |
| 1           |           | 110732 | 136620 |    | 159692 | 176983 |    | 1.233790       |             |             |
| 2           |           |        |        |    |        |        |    |                |             |             |

**Figure S8.** GPC spectrum of PDTz



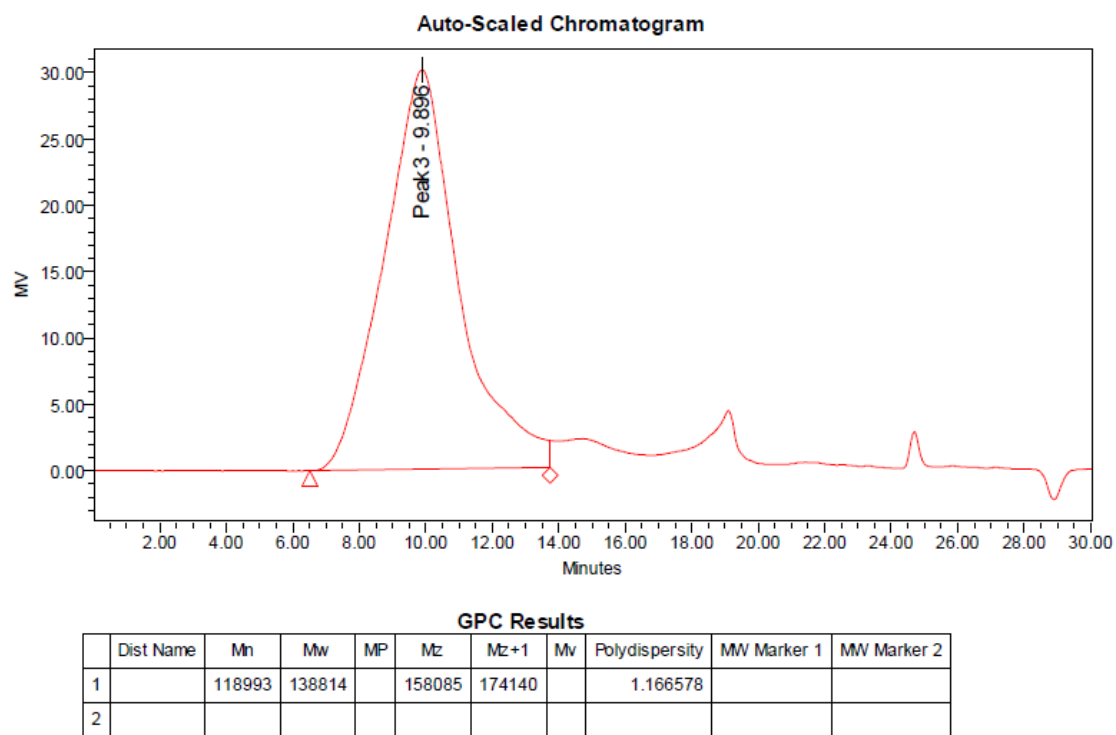

**Figure S9.** GPC spectrum of PDTTz

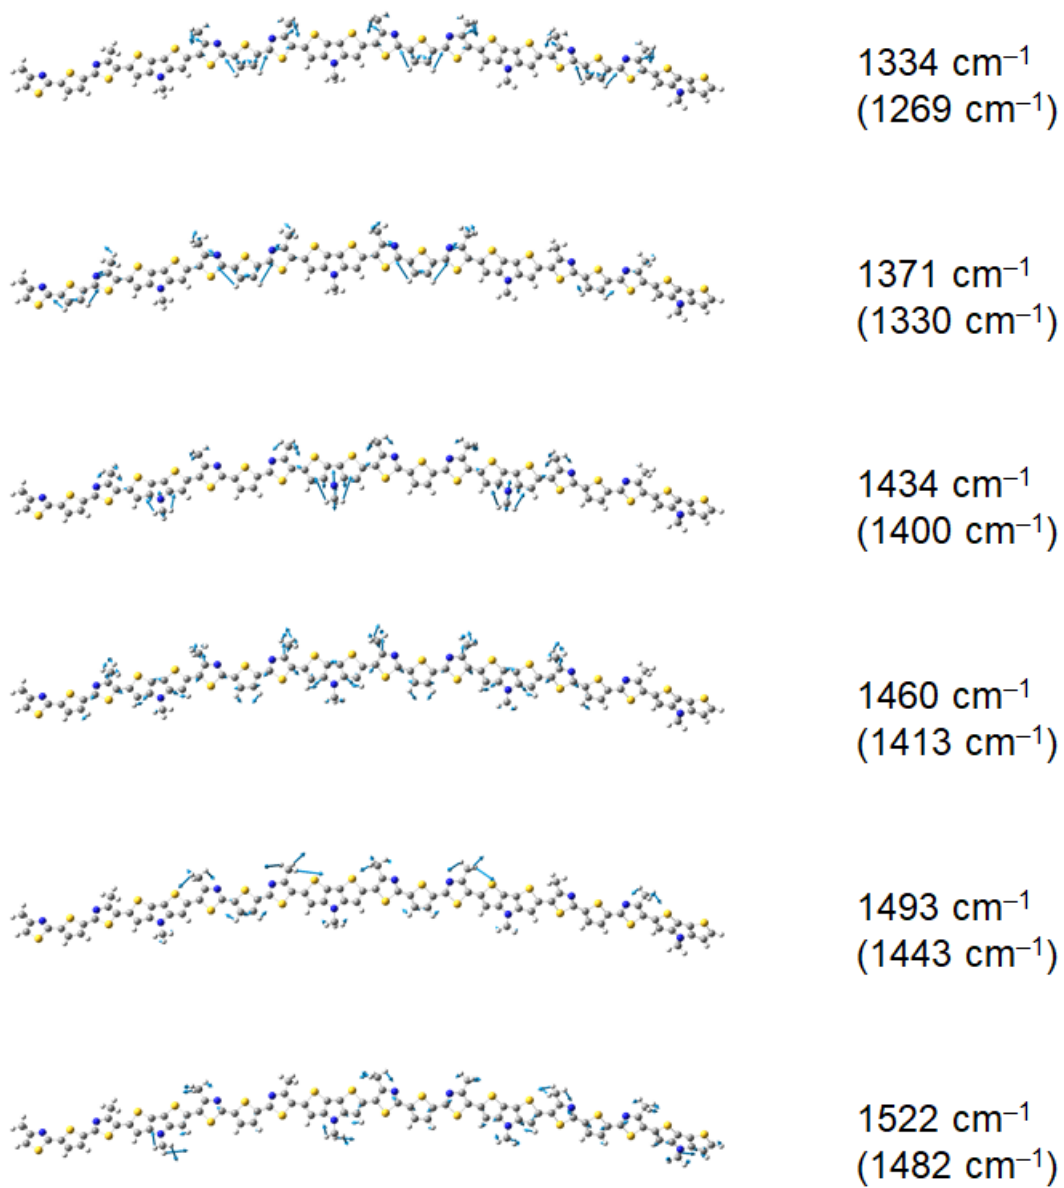

**Figure S10.** DFT-calculated stretching modes of PDTz tetramer. The wavenumbers in parentheses indicate experimental values.

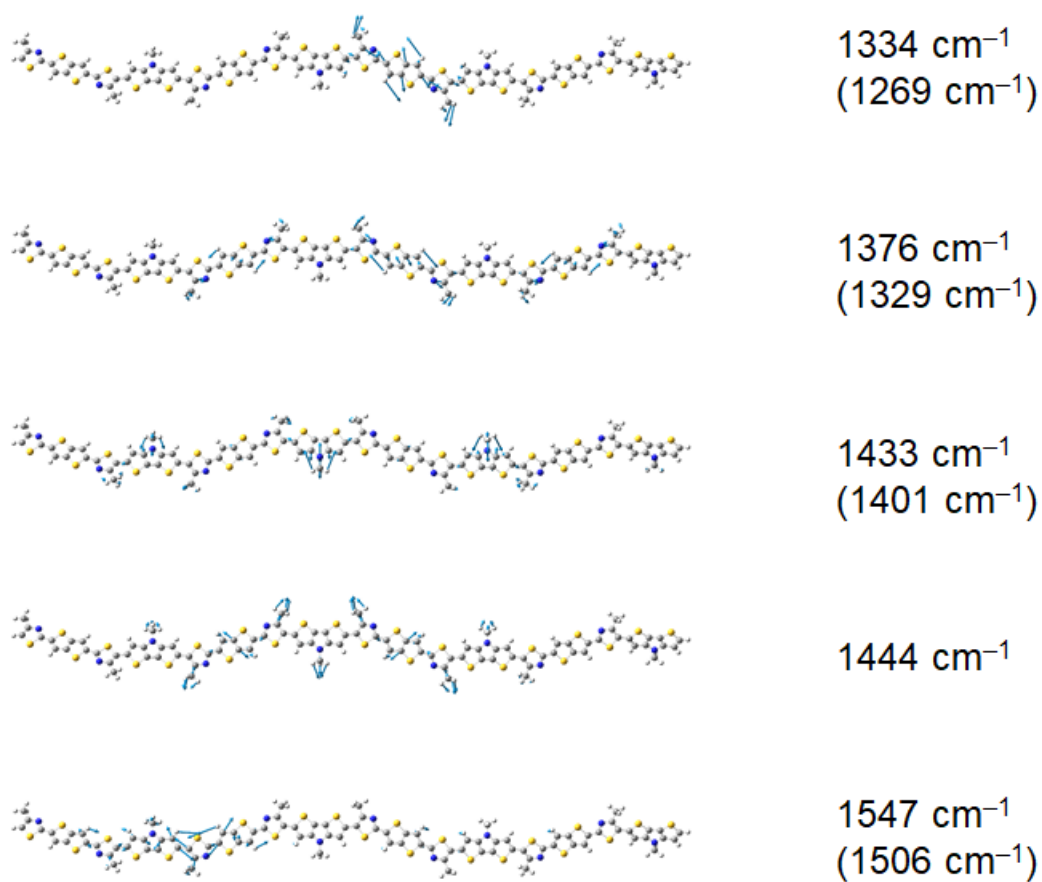

**Figure S11.** DFT-calculated stretching modes of PDTTz tetramer. The wavenumbers in parentheses indicate experimental values.

**Table S1.** d-spacing of (100) and (010) peaks of **Figure 5c-f**.

| F4TCNQ conc.<br>(mg·mL <sup>-1</sup> ) | PDTz                   |                        | PDTTz                  |                        |
|----------------------------------------|------------------------|------------------------|------------------------|------------------------|
|                                        | (100)<br>d-spacing (Å) | (010)<br>d-spacing (Å) | (100)<br>d-spacing (Å) | (010)<br>d-spacing (Å) |
| 0.0                                    | 15.14                  | 3.71                   | 14.84                  | 3.69                   |
| 0.5                                    | 16.39                  | 3.65                   | 15.86                  | 3.64                   |
| 1.0                                    | 16.58                  | 3.65                   | 16.05                  | 3.65                   |
| 1.5                                    | 16.55                  | 3.65                   | 16.06                  | 3.63                   |
| 2.0                                    | 16.63                  | 3.65                   | 16.06                  | 3.63                   |
